# Supplementary material for: Incidence and Predictors of Cardiac Implantable Electronic Devices Malfunction with Radiotherapy Treatment
Source: MDPI journal article supplement (doi:10.3390/jcm11216329), 2022-10-27
Supplement: s1 [file s1]

**Table S1.** Recorded device malfunction during radiotherapy. CIED, cardiac implantable electronic device; CRT-P, cardiac resynchronization therapy pacemaker; CRT-D; cardiac resynchronization therapy defibrillator; DC PPM, dual chamber permanent pacemaker; Gy, gray, ICD, implantable cardioverter defibrillator; MV, megavolt; RT, radiotherapy; V, volt.

| Device type | Manufacturer      | Anatomical Area of Radiation | Cumulative RT Dose/Dose per Fraction, Gy | Beam Type | Beam Energy, MV | Description                                                                                                                                                         |
|-------------|-------------------|------------------------------|------------------------------------------|-----------|-----------------|---------------------------------------------------------------------------------------------------------------------------------------------------------------------|
| DC PPM      | Medtronic         | Thorax                       | 60/17                                    | Photon    | 13              | Increased RV impedance of 1102 $\Omega$ 6 months post last RT fraction. RT was completed and no evidence of lead fracture was found.                                |
| DC PPM      | Medtronic         | Thorax                       | 45/14                                    | Photon    | 14              | Asymptomatic transient ventricular undersensing. RT was completed and the device successfully reprogrammed                                                          |
| DC PPM      | St Jude           | Head and neck                | 50/16                                    | Photon    | 10              | Unexpected decline in battery by 5% a month after the last RT fraction. Increase in frequency of CIED interrogation.                                                |
| DC PPM      | Boston Scientific | Thorax                       | 77/26                                    | N/A       | N/A             | Reduced pacing lead output from 7.5 to 4.0 V after 3rd palliative RT fraction. RT was completed and the patient received no further action as per patient's wishes. |
| DC PPM      | Boston Scientific | Abdomen and pelvis           | 47/14                                    | Photon    | 12              | Battery depletion 6 months post last RT dose. An urgent CIED generator replacement was performed                                                                    |
| CRT-P       | Medtronic         | Thorax                       | 50/11                                    | Photon    | 12              | Unexpected decline in battery by 10% 2 months post RT. Elective generator change was scheduled.                                                                     |
| ICD         | Medtronic         | Thorax                       | 35/10                                    | Photon    | 14              | Asymptomatic short-lived inappropriate tachycardia sensing during RT. No shock                                                                                      |

|       |                   |                    |       |        |    |                                                                                                                                          |
|-------|-------------------|--------------------|-------|--------|----|------------------------------------------------------------------------------------------------------------------------------------------|
|       |                   |                    |       |        |    | was delivered, and RT course was completed                                                                                               |
| ICD   | Medtronic         | Thorax             | 30/15 | Photon | 10 | Partial reset after 3rd fraction of RT. RT was completed and no further action was required.                                             |
| ICD   | Medtronic         | Head and neck      | 32/12 | Photon | 17 | Electrical reset and trend data error 2 months post RT. The device was successfully reprogrammed by the CIED technician.                 |
| ICD   | St Jude           | Thorax             | 40/13 | Photon | 15 | Asymptomatic increase in sensing rate during RT. No shock was delivered and the ICD was successfully reprogrammed                        |
| ICD   | St Jude           | Abdomen and pelvis | 40/13 | Photon | 11 | Partial reset after 3rd fraction of RT. RT was completed and no further action was required.                                             |
| ICD   | St Jude           | Thorax             | 30/10 | Photon | 18 | Asymptomatic short-lived inappropriate tachycardia sensing during RT. No shock was delivered and the RT course was completed             |
| ICD   | Boston Scientific | Thorax             | 32/12 | Photon | 16 | Asymptomatic short-lived inappropriate tachycardia sensing during RT. No shock was delivered, and the RT course was completed            |
| ICD   | Biotronik         | Head and neck      | 35/11 | Photon | 17 | Partial reset after 2 <sup>nd</sup> fraction of RT. No further action was required, and the patient was cleared for the next RT fraction |
| CRT-D | Medtronic         | Thorax             | 44/15 | Photon | 16 | Asymptomatic short-lived inappropriate tachycardia sensing.                                                                              |

|       |           |        |       |        |    |                                                                                                          |
|-------|-----------|--------|-------|--------|----|----------------------------------------------------------------------------------------------------------|
|       |           |        |       |        |    | No shock was delivered and the RT course was completed                                                   |
| CRT-D | Medtronic | Thorax | 20/10 | Photon | 12 | Electrical reset with loss of stored data during 2nd RT fraction. Device reprogrammed by CIED technician |
| CRT-D | Medtronic | Thorax | 48/15 | Photon | 11 | Battery depletion 4 months post last RT fraction. An urgent CIED generator replacement was performed     |
